# Supplementary material for: Metabolic adjustment and regulation of gene expression are essential for increased resistance to severe water deficit and resilience post-stress in soybean
Source: PeerJ. 2022 Mar 18;10:e13118. doi: 10.7717/peerj.13118 (PMC8935993; doi:10.7717/peerj.13118)
Supplement: Supplemental Information 2 — The data are values of the repetitions of each treatment (soybean genotypes x soil water conditions) for the results of physiological, metabolic and gene expression analysis. Data were used for calculations (gene expression analysis) and statistical analysis. [file peerj-10-13118-s002.xlsx]

## Sheet: Growth and Physiology
GENOTYPE	WATER TREATMENT	REP	RGR	LEAF AREA	ROOT L	ROOT:SHOOT	RWC	A	gs	E	WUE	TOTAL CHL	CAROTEN	Fv/Fm	Y (II)	ETR	Y (NPQ)	ABA	PROTEINS	PROLINE	GLYCINE BET	TOTAL ASCORBATE	TOTAL GLUTATHIONE
Lineage 11644	WW	1	207.627	1337.16	64	0.202445	92.4751	26.5501	0.559534	7.02977	4.39039	0.499427	0.0425852	0.820658	0.37834	164.578	0.383385	242.153	18.114	0.86	534.102	7.50401	2.34075
Lineage 11644	WW	2	191.954	1105.7	56	0.244196	93.4866	23.7177	0.546399	8.41718	4.23038	0.51865	0.0604074	0.817665	0.396189	172.342	0.339774	214.06	19.2974	0.86	504.211	7.05969	1.70462
Lineage 11644	WW	3	193.6	1119.81	75	0.212133	98.9362	25.0544	0.682132	6.64638	3.74022	0.514121	0.067046	0.829608	0.369169	160.589	0.356058	283.658	13.8242	0.66	536.088	8.24532	1.82155
Lineage 11644	WD	1	113.343	380.23	46	0.234931	58.2645	7.45089	0.0355941	0.725385	11.4193	0.407869	0.0924544	0.815212	0.123433	53.6933	0.618422	3700.11	19.526	26.1489	734.626	8.14518	2.15925
Lineage 11644	WD	2	85.4859	486.99	57	0.404263	42.8218	7.24221	0.029476	0.676131	11.8546	0.401449	0.104113	0.81173	0.130386	56.7177	0.639181	3700.08	26.3382	27.9267	710.787	6.98379	1.73691
Lineage 11644	WD	3	119.755	534.86	45	0.296314	48.2209	6.94382	0.0320488	0.751061	9.98474	0.365067	0.0968668	0.821336	0.128533	55.9118	0.642142	3787.14	36.4328	28.7044	618.914	7.01041	2.20375
Lineage 11644	RW	1					95.6815	25.7326	0.553825	7.2093	3.56936	0.456034	0.00741587	0.827172	0.388366	168.939	0.334893	388.111	21.9686	1.37111	519.169	6.78852	1.40271
Lineage 11644	RW	2					97.1831	29.5936	0.709154	6.85632	4.31625	0.426113	0.00207135	0.837965	0.41435	180.242	0.310969	359.581	30.9488	1.10444	557.352	7.19567	1.01789
Lineage 11644	RW	3					97.6914	31.1122	0.688673	7.39845	4.20523	0.440481	0.00106709	0.835316	0.398324	173.271	0.27178	203.011	29.4503	1.28222	565.775	5.92439	1.2055
cv. EMBRAPA 48	WW	1	144.838	638.66	65	0.28356	89.5028	28.6649	0.649813	5.92588	4.83727	0.386132	0.0692311	0.826097	0.36906	160.541	0.316746	84.7873	10.0547	1.26	561.32	6.75821	1.70724
cv. EMBRAPA 48	WW	2	172.769	723.5	58	0.312699	97.7273	30.8452	0.707108	8.17283	3.77413	0.382334	0.0516057	0.829814	0.398894	173.519	0.335679	66.0679	16.3965	1.21556	583.844	5.9128	2.2151
cv. EMBRAPA 48	WW	3	158.668	870.38	65	0.282387	88.5609	31.6211	0.685097	8.2436	3.83584	0.378476	0.0763316	0.833866	0.41584	180.89	0.323107	92.6593	20.2956	1.23778	531.862	6.30072	1.88264
cv. EMBRAPA 48	WD	1	117.006	383.2	50.5	0.288044	60.5442	7.22225	0.0335613	0.546853	16.7644	0.346647	0.0853107	0.847559	0.195	84.8252	0.577074	2618.01	57.9593	30.6378	577.957	9.5203	2.6034
cv. EMBRAPA 48	WD	2	128.936	446.66	55	0.203768	57.3206	7.99461	0.0341332	0.640907	13.2072	0.369944	0.0755907	0.849245	0.247096	107.487	0.611504	2496.82	46.6704	34.9711	693.022	8.58739	3.05366
cv. EMBRAPA 48	WD	3	136.625	482.07	51	0.192776	70.9467	8.48594	0.0296562	0.634449	12.4756	0.400568	0.0712176	0.85338	0.1903	82.7805	0.585911	2587.53	36.4553	39.8822	650.248	8.92866	3.03534
cv. EMBRAPA 48	RW	1					95.8904	25.7279	0.591211	7.01873	3.66561	0.499417	0.0893415	0.841297	0.385752	167.802	0.326921	169.952	28.8676	2.37111	585.548	7.08394	2.25087
cv. EMBRAPA 48	RW	2					95.283	28.1536	0.609699	6.07413	4.635	0.533003	0.0868574	0.840203	0.402128	174.926	0.274975	130.849	35.3466	2.30444	537.538	7.20806	1.76309
cv. EMBRAPA 48	RW	3					95.8506	29.289	0.507759	6.10871	4.7947	0.459837	0.0875937	0.8404	0.422416	183.751	0.288839	164.692	38.2947	1.92667	652.528	7.15983	2.13831
Lineage 13241	WW	1	134.626	514.11	59	0.260809	95.7413	25.7184	0.563954	5.43769	4.10904	0.546019	0.0944318	0.827577	0.364543	137.107	0.436801	424.505	22.6231	0.815556	702.627	8.7152	1.3233
Lineage 13241	WW	2	115.68	531.1	73	0.345442	93.3428	27.7099	0.496215	6.74372	3.6966	0.545101	0.109498	0.836199	0.363245	158.012	0.386917	378.859	32.9131	0.904444	664.527	7.80496	1.51876
Lineage 13241	WW	3	110.814	537.69	58	0.544399	98.4231	28.7121	0.541502	7.76757	3.98435	0.481232	0.0909466	0.825055	0.352157	153.188	0.431509	282.271	41.3179	0.882222	698.39	7.39886	1.68892
Lineage 13241	WD	1	88.4046	252.94	44	0.160871	78.2313	9.29533	0.0382331	0.644898	14.4146	0.597025	0.142316	0.834031	0.14133	61.4786	0.539343	4985.52	56.4397	24.9489	959.297	8.80375	2.81806
Lineage 13241	WD	2	111.371	512.85	46	0.328491	49.046	8.15278	0.0332528	0.809104	10.0765	0.580045	0.137733	0.839515	0.145255	63.1861	0.566197	4767.63	58.6586	28.8156	1061.82	7.32375	2.79363
Lineage 13241	WD	3	65.4386	341.02	46	0.2448	76.4391	10.4505	0.0411131	0.615302	10.0968	0.511834	0.132642	0.824317	0.125192	54.4583	0.601064	4717.97	48.8822	26.3489	1117.41	5.90858	2.91318
Lineage 13241	RW	1					94.6108	27.316	0.628173	6.8077	4.01257	0.446968	0.0925121	0.833963	0.367633	159.921	0.445248	130.701	26.5022	5.10444	736.409	6.51339	1.67059
Lineage 13241	RW	2					98.3752	23.7839	0.571013	6.36072	3.73919	0.492438	0.0938673	0.83971	0.303874	132.185	0.256828	121.099	42.9988	1.83778	697.132	7.92566	1.14791
Lineage 13241	RW	3					97.856	26.5189	0.53294	6.44629	4.11386	0.487079	0.0879451	0.833489	0.345947	150.487	0.374836	131.12	40.4774	1.08222	712.381	8.32517	1.50305

## Sheet: Water potential
WATER POTENTIAL (Mpa)	6 days	7 days	8 days	10 days
11644 WW R1	-0.2	-0.25	-0.2
11644 WW R2	-0.25	-0.25	-0.15
11644 WW R3	-0.2	-0.2	-0.2
11644 WD R1	-0.7	-0.9	-1.45
11644 WD R2	-0.6	-1	-1.3
11644 WD R3	-0.8	-1.05	-1.4
11644 RW R1	-0.25	-0.25	-0.2
11644 RW R2	-0.25	-0.25	-0.25
11644 RW R3	-0.2	-0.3	-0.25
EMB 48 WW R1	-0.2	-0.15	-0.15
EMB 48 WW R2	-0.2	-0.15	-0.2
EMB 48 WW R3	-0.15	-0.2	-0.25
EMB 48 WD R1	-0.75	-1.05	-1.45
EMB 48 WD R2	-0.9	-1	-1.3
EMB 48 WD R3	-0.85	-1.1	-1.25
EMB 48 RW R1	-0.2	-0.15	-0.15
EMB 48 RW R2	-0.25	-0.15	-0.2
EMB 48 RW R3	-0.2	-0.2	-0.2
13241 WW R1	-0.15	-0.25	-0.15	-0.2
13241 WW R2	-0.2	-0.25	-0.2	-0.25
13241 WW R3	-0.25	-0.2	-0.2	-0.25
13241 WD R1	-0.45	-0.8	-1.15	-1.35
13241 WD R2	-0.55	-0.65	-0.95	-1.3
13241 WD R3	-0.6	-0.7	-1.05	-1.4
13241 RW R1	-0.25	-0.25	-0.25	-0.3
13241 RW R2	-0.25	-0.25	-0.3	-0.25
13241 RW R3	-0.2	-0.2	-0.25	-0.25

## Sheet: Metabolite profile
Sample	E48C_ R1	E48C_ R2	E48C_ R3	E48WD_R1	E48WD_R2	E48WD_R3	E48RW_R1	E48RW_R2	E48RW_R3	11644C_R1	11644C_R2	11644C_R3	11644WD_R1	11644WD_R2	11644WD_R3	11644RW_R1	11644RW_R2	11644RW_R3	13241C_R1	13241C_R2	13241C_R3	13241WD_R1	13241WD_R2	13241WD_R3	13241RW_R1	13241RW_R2	13241RW_R3
Label	E48C	E48C	E48C	E48WD	E48WD	E48WD	E48RW	E48RW	E48RW	11644C	11644C	11644C	11644WD	11644WD	11644WD	11644RW	11644RW	11644RW	13241C	13241C	13241C	13241WD	13241WD	13241WD	13241RW	13241RW	13241RW
Alanine	0.0996157	0.0859592	0.0736955	0.0988614	0.0989601	0.0957922	0.0760394	0.0796355	0.0724555	0.0712993	0.0759537	0.00745434	0.0762917	0.0973013	0.0980905	0.0804734	0.0822089	0.0731627	0.0720139	0.0768578	0.0732132	0.0980913	0.107797	0.095463	0.0830282	0.0862558	0.0811716
beta-Alanine	0.204614	0.134144	0.142373	0.16853	0.131014	0.151346	0.0965253	0.0824898	0.0668813	0.0206922	0.0332917	0.0139266	0.131534	0.155073	0.11043	0.0408262	0.0288843	0.00983169	0.060847	0.0398825	0.0538045	0.0578952	0.0909091	0.0747615	0.273671	0.251787	0.249385
Alanyl-alanine	0.0151744	0.0599904	0.0639258	0.123833	0.0897394	0.13638	0.135256	0.153901	0.0768176	0.0539641	0.0387199	0.0330082	0.121883	30.3989	0.103726	0.0589163	0.0149063	0.059597	0.0921902	0.101429	0.114553	0.105574	0.118569	0.104938	0.0306844	0.0502863	0.0194774
Allose	0.076163	0.081003	0.0778269	0.218283	0.326534	0.279804	0.0740741	0.0634175	0.058624	0.0120543	0.00649065	0.00309092	0.0584941	0.0663719	0.0509944	0.245347	0.305656	0.266002	0.107854	0.2428	0.207748	0.252081	0.272485	0.313817	0.0402232	0.0430255	0.0571051
Arabitol	0.156305	0.0831874	0.0858792	0.047999	0.011117	0.0824869	0.0857495	0.0910683	0.0804307	0.030875	0.0141506	0.0910683	0.0615244	0.00963222	0.0744689	0.145359	0.170928	0.112721	0.0188475	0.0621336	0.0256442	0.0502977	0.0710741	0.0936157	0.0887781	0.0855449	0.102452
Arginine	0.118911	0.00240636	0.0918835	0.0300272	0.13519	0.0853462	0.0997546			0.0121713	0.0130446	0.0114475	0.143495	0.155395	0.09718	0.015746	0.0363779	0.0195885	0.0708457	0.0344563	0.0653193	0.106893	0.0833333	0.0740479	0.0152228
Ascorbic acid	0.138319	0.0967755	0.124977	0.098114	0.136489	0.0909509	0.0708057	0.075563	0.0687283	0.0669154	0.0831782	0.0835391	0.0870311	0.130548	0.0951049	0.0323556	0.024261	0.0103469	0.0209291	0.0100154	0.00787879	0.0898615	0.157005	0.0883318	0.0566434	0.0856012	0.0841903
Asparagine	0.0348173	0.306478	0.0303156	0.131045	0.284125	0.267525	0.0809967	0.0742978	0.0740741	0.0713055	0.0599336	0.139904	0.0605229	0.0758306	0.0393386	0.0924695	0.0932724	0.121564	0.0574276	0.027517	0.0890242	0.151163	0.267875	0.135659	0.478405	0.299349	0.535437
N-(aminocarbonyl)-Aspartic acid	0.1	0.088646	0.107876	0.0453843	0.0288716	0.0349806	0.0365555	0.047285	0.0320652	0.0400376	0.0402944	0.0106329	0.0170048	0.0558742	0.0476786	0.0283389	0.0767044	0.0428948	0.114663	0.0905622	0.0934294	0.0631097	0.0299828	0.0351374	0.0598201	0.0967149	0.0884703
N-formyl-Aspartic acid	0.0711779	0.0699666	0.0833333	0.117075	0.275272	0.128928	0.0482193	0.0439231	0.0371051	0.086067	0.0328822	0.0123726	0.0748037	0.0663173	0.0865754	0.0694685	0.0814005	0.0834405	0.0763178	0.0397225	0.0329837	0.252373	0.327674	0.159078	0.321406	0.290495	0.233598
Cadaverine	0.0914844	0.0925838	0.115935	0.31386	0.307387	0.406216	0.0156552	0.0294527	0.0171394	0.0129159	0.00907029	0.0115999	0.995225	0.128055	0.91203	0.017949	0.0215669	0.0172441	0.0153085	0.0571591	0.0150121	0.606319	0.207936	0.616944	0.915151	0.838288	0.354224
trans-Caffeic acid	0.104027	0.0944383	0.100748	0.0870198	0.156285	0.116471	0.0767505	0.121137	0.133652	0.0331565	0.0358609	0.0516867	0.0833419	0.0716664	0.139909	0.0549325	0.0703567	0.0474041	0.13827	0.169215	0.132156	0.215737	0.244826	0.272976	0.170604	0.165189	0.14723
Cellobiitol	0.00878985	0.0449199	0.00598219	0.509135	0.522403	0.81104	0.0787491	0.086891	0.0699909	0.0535962	0.0172268	0.0551584	0.343219	0.111312	0.12201	0.0624719	0.0584486	0.0615504	0.0744407	0.0388535	0.0297522	1.37674	1.42213	1.56681	0.0777005
2-hydroxy-cis-Cinnamic acid	0.0606217	0.0666309	0.0715335	0.103688	0.189571	0.128617	0.0632766	0.055477	0.0828218	0.00634512	0.00707736	0.00544618	0.116781	0.0875157	0.0913963	0.130225	0.161522	0.13612	0.0652274	0.0678814	0.0739947	0.130672	0.183085	0.183513	0.0823646	0.0719763	0.0731511
Citric acid	0.0114286	0.0101253	0.0734097	0.036697	0.0741283	0.0689535	0.114994	0.15631	0.0841183	0.0810338	0.0236839	0.0165696	0.0409808	0.0113758	0.0961744	0.00201082	0.00482597	0.00217421	0.133899	0.0145003	0.121337	0.062319	0.00469784	0.0901844	0.176678	0.153748	0.231529
Citrulline	0.0162264	0.0244733	0.0247818	0.237347	0.127848	0.114422	0.0429959	0.0638937	0.0428022	0.0839623	0.0100405	0.00675893	0.175041	0.200127	0.149358	0.161088	0.0168513	0.174043	0.0159479	0.0260729		0.133361	0.134252		0.021816	0.0611242	0.0871842
Cysteine	0.0618005	0.0385239	0.0692079	0.115707	0.179975	0.244282	0.0738938	0.0673479	0.0540687	0.0645219	0.0743552	0.0526268	0.191262	0.0973236	0.160142	0.11841	0.208759	0.165008	0.0719348	0.038569	0.0716024	0.123017	0.144363	0.118904	0.0778589	0.0360908	0.0462287
Dehydroascorbic acid dimer	0.032461	0.0476357	0.0127453	0.254211	0.166648	0.207779	0.316735	0.259128	0.26958	0.0172522	0.00840402	0.0255887	0.0881505	0.0441566	0.0115169	0.145959	0.133373	0.132696	0.484129	0.205454	0.360127	0.191071	0.228928	0.18857	0.0347655	0.020916	0.0225911
Dihydrosphingosine	0.105939	0.0862331	0.114177	0.08255	0.0621748	0.0910719	0.111528	0.10587	0.113439	0.0485906	0.046032	0.068794	0.129302	0.0965063	0.100031	0.0634977	0.0901496	0.0984389	0.0671376	0.0975451	0.0732371	0.140943	0.113564	0.115908	0.0887232	0.0781738	0.0912446
Erythritol	0.113955	0.267984	0.298248	0.302808	0.382864	0.305685	0.0740741	0.0700563	0.0539547	0.0424552	0.0349858	0.0205891	0.0441454	0.0455193	0.40801	0.0652885	0.0723647	0.0408277	0.0793813	0.0214903	0.0998173	0.537295	0.100701	0.416959	0.288023	0.284307	0.371676
Erythrose	0.121467	0.0992109	0.10981	0.114943	0.100509	0.115416	0.0892619	0.0765955	0.0752582	0.0637119	0.00746687	0.00624151	0.142473	0.189955	0.157911	0.0659914	0.0585541	0.0486515	0.0852807	0.118389	0.0991834	0.0667174	0.091557	0.14025	0.157236	0.107844	0.142007
Ethanolaminephosphate	0.0964654	0.0401887	0.067673	0.0969871	0.124495	0.0949114	0.0301514	0.0296453	0.0257722	0.139706	0.0239094	0.078239	0.07895	0.177544	0.0732753	0.111698	0.0588242		0.0469482	0.0857424	0.0761519	0.133071	0.147136	0.147793	0.098239	0.11392	0.0806967
Ferulic acid, trans-	0.0928177	0.053407	0.0662983	0.109679	0.0403555	0.0592667	0.0507469	0.0654798		0.0957643	0.081326	0.00593218	0.0629834	0.0542441		0.172376	0.103466	0.123949	0.110497	0.106654	0.10886	0.108656	0.189854	0.0855153	0.11418	0.0405157
Fructose	0.0905875	0.0759747	0.0733785	0.139877	0.0987118	0.0917628	0.0580964	0.066331	0.0608453	0.131219	0.0631478	0.067346	0.157119	0.118426	0.0817192	0.16841	0.204615	0.179224	0.0964443	0.151122	0.1398	0.17654	0.184723	0.242372	0.0514854	0.0598756	0.0616048
Fructose-1-phosphate	0.1119	0.108038	0.109023	0.0751566	0.0718163	0.092807	0.0906209	0.0868476	0.0521147	0.0519601	0.0469311	0.0129711	0.040846	0.0478261	0.0766019	0.108078	0.242741	0.113461	0.0371806	0.0473813	0.0642708	0.080334	0.0524644	0.0669798	0.0521921	0.0554039	0.0671538
Fructose-2,6-diphosphate	0.124916	0.122352	0.168834	0.210065	0.460702	0.693828	0.145671	0.128611	0.0740741	0.00718444	0.00271502	0.00144148	0.588891	0.713538	0.405454	0.0107302	0.00784667	0.0446416	0.0167224	0.0160854	0.0081754	0.128763	0.187747	0.321943	0.0388796	0.0384615	0.0271739
Fructose-6-phosphate	0.127307	0.0897959	0.0976646	0.125557	0.106013	0.107048	0.0853504	0.0652127	0.0642385	0.0488603	0.0732601	0.0851772	0.0699953	0.10712	0.107708	0.0708202	0.0751405	0.0769231	0.06793	0.0776836	0.0616728	0.108573	0.0918727	0.104607	0.0814426	0.08521	0.0743105
Fucose	0.117844	0.0928041	0.0977297	0.117526	0.0972982	0.0861533	0.0542579	0.0453753	0.0669471	0.0508593	0.0362757	0.0404273	0.0434536	0.102006	0.0829851	0.0965563	0.107733	0.091372	0.0781066	0.0433197	0.0449291	0.0872106	0.0877764	0.0833333	0.0951386	0.107018	0.112098
Fumaric acid	0.129762	0.119087	0.0824772	0.036543	0.0434042	0.0213533	0.0742165	0.0871673	0.0759821	0.0761534	0.0870437	0.0976473	0.000686461	0.000397162	0.000511027	0.150316	0.111034	0.135361	0.176838	0.11992	0.112649	0.0696843	0.0626189	0.0792891	0.0647257	0.0662434	0.086691
2-methyl-Fumaric acid	0.1	0.114943	0.0876969	0.0783312	0.0667761	0.063968	0.0717241	0.0877743	0.063857	0.0749255	0.0928736	0.108131	0.10095	0.0829585	0.091954	0.0680077	0.0654288	0.0741902	0.0908593	0.0851426	0.08867	0.100575	0.11994	0.111111	0.0990274	0.1159	0.122605
Galactinol	0.101206	0.110814	0.105967	0.0997132	0.0719883	0.0576881	0.080053	0.086932	0.0724695	0.0611381	0.0588282	0.107946	0.0164376	0.105594	0.0561457	0.0580448	0.0569425	0.0502982	0.166004	0.159688	0.149971	0.112854	0.120978	0.134776	0.137584	0.135321	0.221154
Galactitol	0.0967326	0.0803689	0.0729741	0.171115	0.103047	0.151145	0.074049	0.0790963	0.0703473	0.0643094	0.0683273	0.0676069	0.0941818	0.164445	0.127237	0.100473	0.0927444	0.0986693	0.0744218	0.0755625	0.0707488	0.108461	0.106335	0.112632	0.0864962	0.083351	0.0855648
Galactonic acid-1,4-lactone	0.109843	0.0835289	0.100246	0.0777189	0.078907	0.0815733	0.0896365	0.106155	0.10738	0.0512463	0.0631277	0.0855477	0.0501379	0.0686185	0.0609332	0.124022	0.117996	0.12904	0.0718761	0.071479	0.0969896	0.101095	0.109438	0.104039	0.0821935	0.0979854	0.0980457
Galactose	0.117994	0.0977868	0.0926319	0.122078	0.104117	0.118209	0.00441734	0.00696788	0.0711252	0.0501311	0.084337	0.0111979	0.0470515	0.00777638	0.00489188	0.0704656	0.0972782	0.0717356	0.026134	0.0105262	0.0421156	0.106121	0.0944143	0.114157	0.0785337	0.0827668	0.0779737
Galacturonic acid	0.0626687	0.065534	0.0870191	0.127376	0.224442	0.358961	0.00618123	0.0088098	0.00273623	0.0046646	0.00694599	0.00857671	0.328469	0.285057	0.432926	0.423171	0.46422	0.315122	0.316067	0.278659	0.244057	0.252126	0.406875	0.253871	0.0535851	0.0804333	0.0816571
Gluconic acid	0.00255542	0.00362587	0.00659565	0.115773	0.100638	0.159808	0.0916857	0.144101	0.0706529	0.084679	0.0740036	0.00944378	0.147708	0.133075	0.198214	0.189757	0.14127	0.0153864	0.127218	0.146089	0.124665	0.00735323	0.112589	0.113018	0.0136177	0.0134513	0.00819793
Glucuronic acid	0.108233	0.0856345	0.100031	0.0770262	0.0845033	0.0788199	0.0860943	0.104285	0.105385	0.0547924	0.0599345	0.0885033	0.057273	0.0745451	0.0742746	0.109501	0.114704	0.101418	0.12951	0.118296	0.0971549	0.0958931	0.0780444	0.0824406	0.0841561	0.0986228	0.10129
Glutamine, DL-	0.0729052	0.109511	0.0783699	0.0963573	0.0305657	0.075818	0.107177	0.126304	0.11674	0.0224793	0.0294288	0.0155794	0.119093	0.175947	0.1016	0.0598069	0.0487649	0.010435	0.0308906	0.071333	0.0740952	0.13818	0.149238	0.188913	0.0953518	0.0969755	0.0852874
N-gamma-ethyl-Glutamine	0.0337761	0.0312952	0.0538221	4.27577	5.05734	8.69848	0.0326777	0.0362879	0.0237531	0.0290639	0.0689987	0.0320257	0.143278	0.0836565	0.140703	6.88472	5.90987	4.15387	0.105178	0.155876	0.0510761	2.48719	3.42953	6.8194	0.0769231	0.0615968	0.0712851
Glutaric acid	0.103297	0.0860806	0.0604686	0.105931	0.125903	0.371628	0.191397	0.235764	0.17233	0.0195918	0.00894214	0.00657619	0.112757	0.0364207	0.0362495	0.0489273	0.0392465	0.0468103	0.0965837	0.123263	0.0923974	0.0599163	0.0482375	0.126408	0.14974	0.173409	0.146782
3-oxo-Glutaric acid	0.105468	0.0840554	0.0803815	0.0947544	0.154825	0.0890893	0.0762651	0.0804063	0.0941956	0.00678551	0.00738198	0.00673232	0.0286824	0.0145802	0.0235761	0.802958	0.087656	0.0846348	0.106876	0.0549226	0.0753798	0.0640096	0.0649511	0.0756897	0.0832433	0.0869435	0.0884872
Glyceraldehyde-3-phosphate	0.0893639	0.0839695	0.0826972	0.104985	0.147361	0.133333	0.0418434	0.0466158	0.0512676	0.0916031	0.0677863	0.0620111	0.105543	0.116794	0.109968	0.115776	0.131298	0.11728	0.11414	0.117048	0.0947007	0.0635115	0.0983885	0.0833333	0.0481503	0.0528479	0.0581001
Glycerol	0.05121	0.044038	0.0702841	0.0875648	0.110341	0.11487	0.097662	0.08	0.0860977	0.0536291	0.0551672	0.00980717	0.0543667	0.0303151	0.0501007	0.0952579	0.112466	0.112329	0.0415096	0.0560553	0.0728784	0.117257	0.134218	0.161196	0.0953096	0.12299	0.109176
Glycerol-3-phosphate	0.0849206	0.0869048	0.0744048	0.102041	0.120945	0.137103	0.0611405	0.0575397	0.0577601	0.078254	0.0752499	0.0872836	0.119048	0.127674	0.106782	0.619709	0.400992	0.292749	0.119237	0.0952381	0.0671664	0.155423	0.119949	0.209627	0.0517399	0.0608974	0.0613426
DL-Glycylglycine	0.0820279	0.0860157	0.0883007	0.0532138	0.0430584	0.0310354	0.0504721	0.0639387	0.0487601	0.117926	0.130451	0.0956128	0.0236285	0.0133047	0.0173869	0.144984	0.125289	0.145874	0.13785	0.07622	0.118601	0.109485	0.0974932	0.0909685	0.0833333	0.0768062	0.102401
Guanosine	0.079255	0.0718391	0.0814324	0.0545419	0.0584989	0.0630142	0.0580518	0.06875	0.0572642	0.0897393	0.0728527	0.0980489	0.0702563	0.038558	0.0505554	0.107855	0.106273	0.0947646	0.1133	0.105108	0.0927924	0.081177	0.0881297	0.0976636	0.0743973	0.0855218	0.0849007
Gulose	0.110233	0.0910256	0.0846469	0.111536	0.120968	0.105371	0.0709429	0.0675169	0.0729313	0.0755586	0.0777938	0.0100185	0.154477	0.0962861		0.0914359	0.06679	0.0868975	0.116445	0.0621166	0.0839205	0.0972088	0.0872645	0.100877	0.0757258	0.0795844	0.0754312
Histidine	0.0652874	0.0737548	0.0727969	0.278861	0.663218	0.354232	0.0595998	0.0595611	0.0553427	0.105577	0.0836782	0.0901688	0.146927	0.0770115	0.0804598	0.0900383	0.0931034	0.0869565	0.911877	0.0996169	0.116585	0.0785441	0.217346	0.069965	0.0670498	0.0833333	0.109195
N-tau-methyl-Histidine	0.158923	0.140572	0.128445	0.102507	0.118005	0.114478	0.10101	0.0891582	0.0932785	0.0436463	0.0495623	0.0813069	0.0869565	0.0854926	0.107226	0.0690236	0.0872831	0.0710132	0.0532307	0.0698341	0.0586821	0.063569	0.0676329	0.0746352	0.0805491	0.0765993	0.0782828
Histidinol	0.0826016	0.0886179	0.0860434	0.0987654	0.117693	0.0721103	0.0800964	0.0813008	0.0722674	0.0650407	0.0715447	0.0481783	0.114528	0.115235	0.0900563	0.0799458	0.0837398	0.0798226	0.0797522	0.0636267	0.0667828	0.0826016	0.0931264	0.101096	0.0846883	0.0779133	0.0853659
N-2-oxocaproyl-Homoserine lactone	0.10501	0.118898	0.127856	0.0509645	0.0525304	0.0738629	0.062543	0.0648186	0.0264313	0.0208319	0.0191672	0.00907029	0.0544244	0.0151826	0.0322637	0.143071	0.134914	0.118747	0.0802904	0.0750231	0.0706507	0.155798	0.111968	0.203342	0.064505	0.0591501	0.0524237
Homovanillic acid	0.0388242	0.0355888	0.0664736	0.0474342	0.068386	0.0452277	0.0541895	0.0338829	0.0302788	0.0740741	0.0562618	0.0856186	0.118257	0.11001	0.187764	0.221353	0.191449	0.188237	0.154716	0.124196	0.0966643	0.204947	0.105178	0.275097	0.170912	0.198942	0.254067
allo-Inositol	0.102233	0.0795651	0.110626	0.142998	0.247184	0.136527	0.108466	0.115159	0.108871	0.0128774	0.00886772	0.0106014	0.0169707	0.126435	0.124946	0.0176702	0.0151879	0.0145042	0.022816	0.0117599	0.0896676	0.125771	0.2221	0.135701	0.119393	0.122847	0.124459
myo-Inositol	0.187971	0.154648	0.194011	0.0537233	0.0353218	0.0576566	0.0449233	0.0391889	0.0320456	0.103343	0.0657363	0.132415	0.0537109	0.0109763	0.0337088	0.0823247	0.0643662	0.0671848	0.108522	0.122856	0.0950031	0.248735	0.17756	0.220107	0.110764	0.133559	0.129121
Isocitric acid	0.0685193	0.11346	0.129145	0.0519085	0.0748627	0.0750436	0.0775621	0.101978		0.0553094	0.0114971	0.00517698	0.0645783	0.107035	0.0920206	0.118965	0.15782	0.15255	0.148425	0.126669	0.103293	0.0909091	0.0876686	0.119613	0.0895422	0.0757932	0.101803
Isoleucine	0.0457928	0.0935728	0.0529768	0.784385	0.757631	0.754948	0.0446281	0.0495611	0.0530676	0.058872	0.0502137	0.0811785	0.781354	0.677475	0.763392	0.0583031	0.0364458	0.0525081	0.0218939	0.022711	0.0355432	0.785019	0.745884	0.806099	0.207045	0.1689	0.108018
Isomaltose	0.0749606	0.096063	0.0746573	0.121485	0.13557	0.123622	0.071811	0.0601288	0.0746573	0.0927384	0.105827	0.0688247	0.119685	0.137624	0.0937724	0.0708661	0.071582	0.0718932	0.0847394	0.100487	0.0770529	0.154856	0.183499	0.152231	0.0774278	0.0833333	0.093832
Itaconic acid	0.0796098	0.0463415	0.0426378	0.0899258	0.118049	0.0656319	0.037579	0.0491707	0.0771619	0.0455285	0.12722	0.0534779	0.097561	0.104656	0.0878049	0.115447	0.112195	0.187617	0.105923	0.111135	0.121951	0.130081	0.169401	0.0873807	0.0562852	0.0479675	0.0593496
Lactic acid dimer	0.111744	0.0981184	0.102984	0.10071	0.0961729	0.0979777	0.0792972	0.0746055	0.0684716	0.0610814	0.0535838	0.0850621	0.140318	0.0957561	0.122061	0.0915581	0.103947	0.110059	0.0848516	0.100987	0.0852772	0.103146	0.110147	0.117885	0.0712663	0.0908349	0.0903851
Lactitol	0.102994	0.0818557	0.111429	0.184194	0.205741	0.204116	0.132389	0.117852	0.147864	0.0273875	0.0410223	0.0118038	0.211106	0.107916	0.144267	0.0686767	0.0781504	0.0727527	0.0992779	0.098443	0.110284	0.0615742	0.0423245	0.0595588	0.0679237	0.100177	0.0814937
Leucine	0.0533845	0.0950028	0.0586247	1.12747	1.07054	1.04838	0.0360253	0.0457027	0.0438408	0.0673856	0.0635648	0.0989668	1.0587	0.903333	1.01394	0.065186	0.0458701	0.0562525	0.0580448	0.0321673	0.0475192	1.03198	1.14886	1.07558	0.187208	0.117635	0.105227
Lyxonic acid-1,4-lactone	0.1	0.104111	0.0986084	0.153695	0.158683	0.124759	0.0469754	0.0431381	0.0496411	0.0874624	0.0668288	0.0901699	0.0670813	0.173542	0.115933	0.0721049	0.0634849	0.0633709	0.112943	0.0984235	0.0976629	0.135397	0.11825	0.122018	0.0441746	0.0522688	0.0541891
Maleamic acid	0.0305361	0.0426591	0.0340398	0.15102	0.143179	0.154159	0.131084	0.130938	0.106933	0.119766	0.110604	0.0489741	0.102234	0.164244	0.106615	0.123053	0.0933692	0.0920839	0.0403978	0.0597599	0.0210529	0.146358	0.121201	0.155647	0.0575868	0.0444244	0.0376768
2-methyl-Malic acid	0.0427576	0.0153603	0.0328004	0.136926	0.0926586	0.135739	0.0750309	0.08675	0.0639827	0.0854129	0.0688835	0.0395682	0.156389	0.401364	0.149692	0.079754	0.0786626	0.0670572	0.903562	0.0736483	0.103721	0.153492	0.10872	0.191257	0.101255	0.0961846	0.10309
3-oxalo-Malic acid	0.0328895	0.0270188	0.0249451	0.166224	0.417027	0.32926	0.0368588	0.025352	0.0396409	0.0307005	0.00227091	0.00314276	0.267624	0.21029	0.233739	0.289476	0.361465	0.113143	0.350246	0.216797	0.243641	0.293251	0.42954	0.419453	0.0416308	0.02192	0.0286462
Malonic acid	0.11456	0.116133	0.111445	0.0926265	0.0826549	0.0798937	0.0757552	0.101782	0.0646732	0.0949107	0.0873246	0.109707	0.0665295	0.0561066	0.0839297	0.120693	0.122635	0.129132	0.0797388	0.090499	0.0865586	0.0373816	0.0498186	0.0465009	0.0695069	0.0694299	0.0526088
Maltose	0.0712727	0.0833333	0.0878114	0.0288215	0.0295652	0.0556364	0.056431	0.0538182	0.0626446	0.056431	0.0385455	0.0132426	0.246957	0.144132	0.132727	0.127273	0.128811	0.168538	0.109957	0.0145455	0.115455	0.242121	0.105455	0.155152	0.104895	0.0686364	0.14197
Maltotriitol	0.0709859	0.0950704	0.0833333	0.123407	0.0967544	0.1242	0.113719	0.109296	0.117798	0.0532081	0.0709859	0.102243	0.102878	0.0901408	0.099675	0.0798122	0.0653009	0.0722596	0.0869565	0.084507	0.084507	0.0912676	0.0774648	0.0883483	0.107981	0.0903756	0.11385
Maltotriose	0.184111	0.338584	0.40478	0.0931915	0.0523462	0.123084	0.27398	0.181843	0.147152	0.119809	0.226272	0.151964	0.0255208	0.00176547	0.00350131	0.0451429	0.0326554	0.0310447	0.0952381	0.126596	0.181834	0.039898	0.0610986	0.0678269	0.0306392	0.0937601	0.026563
1-O-methyl-alpha-Mannopyranoside	0.498097	0.493482	0.021735	0.0226638	0.0621348	0.0480519	0.0404279			0.00695581	0.00167516	0.00190862	0.114473	0.107369	0.17788	0.274769	0.171326	0.134504	0.0182646	0.0902989	0.235817	0.076925	0.0398082	0.0688249	0.0598308	0.0549055	0.0437736
Mannose	0.0082957	0.00829831	0.00890001	0.0788669	0.146284	0.157499	0.00534416	0.0080478	0.00294823	0.00181461	0.00936772	0.000846534	0.0643681	0.00786568	0.00702043	0.104671	0.128056	0.124926	0.0937235	0.0109879	0.0630596	0.137682	0.130681	0.160439	0.0923859	0.108877	0.116027
N-acetyl-Methionine	0.0422147	0.124186	0.104367	0.0731825	0.134944	0.0693833	0.0555787	0.0506269	0.0427682	0.128989	0.0379008	0.0337378	0.0194126	0.0764389	0.0982927	0.0744565	0.0938241	0.0691633	0.118266	0.0879657	0.0457851	0.093766	0.0972878	0.0730541	0.223873	0.217148	0.117333
N-formyl-Methionine	0.0684033	0.0709656	0.066683	0.184076	0.219169	0.244589	0.0711689			0.0103376	0.066683	0.00558964	0.201498	0.137751	0.131326	0.211289	0.262108	0.225587	0.178909	0.144427	0.196653	0.217088	0.234507	0.239803	0.00976224	0.0095207	0.0368728
N-acetyl-Muramic acid	0.0634872	0.0766239	0.0922697	0.163956	0.112923	0.137622	0.0676163	0.08	0.0490408	0.0378348	0.0454974	0.00974475	0.0699666	0.132664	0.142051	0.0454701	0.0107692	0.0262471	0.110574	0.125356	0.0868132	0.297805	0.196143	0.216838	0.164024	0.152436	0.156368
N-acetyl-Neuraminic acid	0.0783439	0.0944798	0.0592121	0.22384	0.183121	0.290388	0.079264	0.0631847	0.0695919	0.0471809	0.0371975	0.0853975	0.0875104	0.0257962	0.0277939	0.0636943	0.0599305	0.0612019	0.151653	0.160651	0.199727	0.362478	0.352257	0.426221	0.114895	0.0842724	0.154459
Nicotinamide	0.0212	0.0802083	0.0195833	0.0188889	0.023913	0.0595	0.0692593	0.194091	0.02	0.0351852	0.0698	0.00324263	1.10935	0.0965909	1.13058	0.0464583	0.061	0.0375	0.130714	0.0869565	0.0844643	1.0806	0.0919565	1.21875	0.429808	0.474038	0.648542
Nicotinic acid	0.024808	0.0518611	0.12523	0.0692271	0.0648772	0.0775249	0.0720721	0.0851778	0.0615352	0.0760761	0.0615647	0.00530806	0.0278929	0.00896159	0.00782361	0.0678046	0.0797297		0.188512	0.104112	0.13417	0.105145	0.127376	0.119179	0.12986	0.18339	0.135372
Ornithine	0.0555951	0.0680714	0.0581898	0.0952531	0.0481609	0.0861891	0.0432801	0.044711	0.0432801	0.0882461	0.0606259	0.0753648	0.335178	0.311584	0.156171	0.0941204	0.0769231	0.066578	0.0902594	0.0930793	0.0607976	0.153001	0.167076	0.185788	0.0861486	0.0462008	0.0862079
Oxaloacetate	0.0820026	0.099723	0.0871011	0.119714	0.0953144	0.099482	0.0528266	0.0779586	0.0676435	0.0701934	0.067292	0.0693994	0.0822863	0.090657	0.100747	0.109854	0.0824253	0.0961618	0.105013	0.0931328	0.0853172	0.105671	0.0917143	0.101063	0.0666346	0.081528	0.0648253
2-methyl-Pentanedioic acid	0.134639	0.113564	0.128626	0.0533742	0.053157	0.0619351	0.0764999	0.0780819	0.0506101	0.0831345	0.113032	0.0125693	0.0121027	0.00389864	0.00225058	0.0611274	0.0482651	0.065373	0.173415	0.207942	0.130841	0.129559	0.0890414	0.0911631	0.182231	0.144354	0.203541
Phenylpyruvic acid	0.132287	0.120412	0.138371	0.140079	0.175242	0.137568	0.0650602	0.0638772	0.0681133	0.0551739	0.0875368	0.0928288	0.220933	0.177357	0.108326	0.0946026	0.0980599	0.0873405	0.0691215	0.105041	0.0638581	0.0766274	0.0910875	0.0857618	0.0659961	0.0628067	0.0682041
Phosphoenolpyruvic acid	0.153226	0.185738	0.149867	0.0434529	0.0451801	0.0658106	0.0382234	0.0295339	0.0338534	0.0591379	0.0387314	0.0181216	0.374388	0.391837	0.371016	0.0848765	0.106875	0.0823549	0.0345158	0.0613625	0.067175	0.0519925	0.05423	0.0416623	0.327967	0.25725	0.190403
Phytol	0.153502	0.118677	0.124946	0.0724888	0.0825579	0.077821	0.140366	0.0940078	0.123806	0.0436662	0.0490272	0.0755152	0.0407714	0.0268482	0.0397948	0.0622568	0.0652499	0.0869565	0.108764	0.110391	0.0789327	0.212918	0.105228	0.159371	0.0815499	0.07393	0.0661479
Proline	0.0327875	0.0390384	0.025237	0.447571	0.459848	0.468428	0.0382098			0.0201717	0.0461396	0.00658846	0.341028	0.462398	0.415579	0.0739639	0.0769231	0.0710047	0.0417658			0.328002	0.321816	0.368778	0.120792	0.0989633	0.0801558
Putrescine	0.00849764	0.0667152	0.0137626	0.0110478	0.031379	0.072972	0.0225806	0.0231066	0.017407	0.0163831	0.0147254	0.0096609	0.996093	0.378782	0.22576	0.104341	0.158883	0.153669	0.0123335	0.00999573	0.0692508	0.262612	0.216237	0.317509	0.353462	0.203165	0.269068
3-hydroxy-Pyridine	0.16374	0.163292	0.170277	0.0540589	0.0514519	0.0909091	0.0971597	0.0847771	0.0687529	0.0575193	0.0654724	0.0186488	0.0255001	0.00677231	0.0130136	0.0478905	0.0444698	0.0303402	0.120051	0.118164	0.0873106	0.0269598	0.0388548	0.0548312	0.18084	0.156678	0.146712
3-hydroxy-Pyruvic acid	0.0683785	0.0874374	0.0753675	0.103676	0.104341	0.0966712	0.0742089	0.0794555	0.0719477	0.0685682	0.0728127	0.0706271	0.0774485	0.0908718	0.0936927	0.0881382	0.0953719	0.0901032	0.076987	0.0756679	0.075129	0.0936426	0.0903189	0.0968122	0.0797549	0.0840284	0.0837526
Quinic acid	0.325898	0.272409	0.200605	0.0325383	0.0411864	0.0415584	0.420508	0.454576	0.303483	0.029822	0.0327889	0.0487652	0.0343774	0.0517488	0.0414612	0.0387064	0.0479756	0.0416001	0.0361599	0.0338792	0.0281567	0.0285205	0.0356275	0.0257747	0.973027	0.935511	0.749936
5-caffeoyl-trans-Quinic acid	0.17542	0.156172	0.297994	0.144388	0.152646	0.0839529	0.220163	0.212236	0.390307	0.0258882	0.0165563	0.0282853	0.0248447	0.00264126	0.00319139	0.00590661	0.00604059	0.0018954	0.189032	0.283537	0.20385	0.402983	0.101647	0.285433	0.128196	0.101457	0.172802
Raffinose	0.129333	0.120067	0.0722222	0.0740741	0.0987826	0.129054	0.0617284	0.0827879		0.0921481	0.0849718	0.00914286	0.123652	0.085	0.0878788	0.0800377	0.0742424	0.0942029	0.0753296	0.0707443	0.0602637	0.0882778	0.237994		0.110778	0.074359	0.1
Rhamnose	0.251136	0.307777	0.313529	0.229588	0.124867	0.22098	0.0421836	0.0430925	0.0316105	0.0434882	0.0394584	0.0295869	0.0920329	0.0345503	0.0363463	0.038375	0.0553627	0.0552666	0.0852331	0.0503595	0.0672587	0.283289	0.205482	0.278336	0.300817	0.263937	0.331395
Ribonic acid	0.0679608	0.0833333	0.113667	0.0697634	0.0805592	0.0719438	0.0663688	0.0965289	0.108178	0.00267457	0.00374205	0.002878	0.00132434	0.0930544	0.0804386	0.0884301	0.067605	0.103956	0.100343	0.0121816		0.00234635	0.00912394	0.00402796	0.0606241	0.0741623	0.0673217
Ribose-5-phosphate	0.112502	0.0904098	0.110237	0.0937257	0.0985642	0.0958765	0.0783722	0.0898382	0.0566105	0.0027561	0.00473657	0.00298046	0.074884	0.104393	0.0769231	0.362551	0.364257	0.158234	0.0495716	0.0650171	0.0430994	0.163542	0.256086	0.364609	0.0492717	0.0453555	0.034959
Ribulose	0.181891	0.201873	0.233981	0.136828	0.18482	0.154493	0.031672	0.0285078	0.0244715	0.0354796	0.0335204	0.0204322	0.186539	0.217262	0.131517	0.0208158	0.0241783	0.0140342	0.0611136	0.0702118	0.0526465	0.172005	0.137843	0.178929	0.252228	0.266226	0.337608
Serine	0.000656152	0.00150128	0.0747449	0.00172852	0.10312	0.0959341	0.0725583	0.0777545		0.0699095			0.00180906	0.00235092	0.0921846	0.0817153	0.00151061	0.0900124	0.00105071	0.0018263	0.0745194	0.0923303	0.101717	0.0966859	0.0809778	0.0835792	0.0760807
3-dehydro-Shikimic acid	0.169823	0.135296	0.129746	0.00532789	0.0104007	0.00941459	0.0799112	0.0931761	0.0929309	0.0161799	0.014385	0.0111894	0.00719855	0.00362745	0.00201603	0.0693426	0.0869068	0.0469206	0.177674	0.129202	0.261082	0.0108792	0.0158445	0.0328739	0.0998799	0.0510261	0.0966114
Shikimic acid-3-phosphate	0.0730262	0.0682697	0.0806388	0.141935	0.133789	0.11209	0.0795186	0.0729383	0.0554741	0.0283558	0.0236891	0.0795186	0.0818006	0.131467	0.101689	0.0486343	0.0662374	0.08714	0.08447	0.0927131	0.0714286	0.167273	0.169407	0.131015	0.0969553	0.101621	0.103657
Sorbitol	0.0947868	0.0780929	0.0715896	0.113367	0.122267	0.119885	0.0723847	0.0767963	0.0690322	0.0669702	0.0665055	0.0662789	0.0879122	0.051808	0.0722262	0.105947	0.0922279	0.0986291	0.099974	0.0780298	0.0743703	0.0924007	0.116736	0.106028	0.0868422	0.0850332	0.0839446
Spermidine	0.0618182	0.0598485	0.0464646	0.143723	0.12	0.122314	0.123636	0.120661	0.0639731	0.0740741	0.0807273	0.0821549	0.0918182	0.120949	0.172028	0.0742424	0.0944056	0.0893281	0.0883117	0.0822134	0.0787879	0.150545	0.115415	0.2	0.0636364	0.0902098	0.0916667
Spermine	0.0791667	0.0819444	0.0759259	0.133333	0.135507	0.213333	0.0839506	0.0913333	0.0734848	0.0796296	0.0866667	0.0716049	0.156522	0.1375	0.133333	0.0743056	0.0525641	0.0984848	0.0936508	0.0888889	0.0950617	0.165278	0.211364	0.265217	0.0458333	0.0645833	0.0576389
Sphingosine	0.0800087	0.0621294	0.0838477	0.118511	0.0980221	0.106712	0.0739399	0.0715354	0.0870091	0.0571403	0.0570296	0.0494663	0.0722357	0.158572	0.168507	0.0500167	0.0700799	0.09289	0.0219272	0.0461114	0.0446221	0.203793	0.100748	0.18736	0.0568686	0.0484521	0.0714676
O-1-beta-galactosyl-Sphingosine	0.1	0.142272	0.151101	0.169522	0.138327	0.174497	0.144761	0.169706	0.156454	0.128336	0.127904	0.134225	0.0932305	0.137638	0.147642	0.115901	0.152459	0.142054	0.0349609	0.0447219	0.0301701	0.0517004	0.0663325	0.0553904	0.0116686	0.0256897	0.0109864
Succinic acid	0.1831	0.109561	0.137564	0.0885329	0.0677068	0.110745	0.0533297	0.0982701	0.0564033	0.0343637	0.0329393	0.0106817	0.109939	0.0692221	0.0902207	0.0500018	0.0540462	0.0479663	0.0238521	0.0558265	0.0714286	0.0966111	0.0663325	0.0819615	0.0879584	0.0860004	0.0842579
2,2-dimethyl-Succinic acid	0.0611991	0.0860451	0.0744794	0.103269	0.103022	0.0942846	0.0805409	0.0867983	0.0700067	0.0666789	0.0740897	0.0679501	0.0768802	0.0799472	0.0869565	0.0867048	0.0967434	0.0876727	0.0731903	0.0761332	0.0745697	0.0909091	0.106612	0.0994576	0.0832826	0.0844411	0.0839006
Tagatose	0.107516	0.0906947	0.0900383	0.128063	0.100638	0.112337	0.0583625	0.059564	0.0622628	0.0721711	0.0742776	0.0826539	0.0868868	0.154811	0.0966184	0.0673984	0.0899604	0.0688741	0.0854351	0.0893267	0.0774701	0.10778	0.106764	0.108286	0.0590113	0.0633332	0.0631798
Talose	0.0598991	0.0780231	0.0858512	0.892646	1.65761	0.788177	0.0167403	0.0184833	0.010347	0.0175041	0.0740741	0.0212293	0.728921	0.0758738	0.0543654	0.51816	0.0345644	0.021879	0.0652666	1.07362	0.094282	1.98903	1.80761	1.7953	0.0188983	0.0180547	0.0173922
Tartaric acid	0.0590106	0.0350412	0.0311478	0.0309608	0.0482409	0.0446515	0.0689753	0.0424028	0.04947	0.0477739	0.0458055	0.0526361	0.0419435	0.0359502	0.0497418	4.39517	6.8417	5.01156	0.105671	0.116776	0.0748593	0.0565371	0.285336	0.0382803	0.0358793	0.0824499	0.0904005
Tartronic acid	0.301926	0.29374	0.185007	0.0267523	0.0228906	0.0350212	0.108079	0.0729374	0.0609952	0.256822	0.260389	0.0130012	0.0621118	0.074274	0.0726016	0.527421	0.373873	0.314169	0.0712375	0.0224719	0.0740741	0.452135	0.191303	0.293391	0.0757089	0.0782504	0.0708935
2-(methylaminomethyl)-Tartronic acid	0.0590514	0.0716685	0.0161032	0.0813605	0.0160544	0.0273241	0.2257	0.294975	0.246482	0.206783	0.215703	0.216227	0.0817745	0.0483158	0.0981176	0.113737	0.127298	0.143665	0.307054	0.224625	0.213308	0.110986	0.123772	0.40191	0.026071	0.024367	0.023606
4-methyl-5-hydroxyethyl-Thiazole	0.112932	0.098025	0.114845	0.0655029	0.0609717	0.0698733	0.0701201	0.0723093	0.0494511	0.00665611	0.0112595	0.00641245	0.0326288	0.110572	0.10164	0.182517	0.163812	0.170086	0.156235	0.197456	0.174188	0.0628854	0.0689123	0.0877815	0.152476	0.121967	0.126781
Threonic acid	1.01897	0.667069	0.717399	0.496861	0.10418	0.48776	0.058666	0.0503634	0.0465931	0.0587929	0.0503048	0.0730436	0.0674965	0.0681977	0.0167676	0.0584832	0.0353551	0.0210592	0.0956722	0.0101403	0.0701978	0.899035	0.989984	0.822619	1.11242	1.0507	0.726688
Thymidine	0.153569	0.12339	0.11826	0.0233743	0.0668741	0.0833223	0.0739776	0.072652	0.0740741	0.0583879	0.0628939	0.0140529	0.0401942	0.0105215	0.0184172	0.0612717	0.0476841	0.0426266	0.0991006	0.0404545	0.0630723	0.0247747	0.0548005	0.0705371	0.112445	0.109267	0.10693
alpha,alpha'-D-Trehalose	0.102058	0.120836	0.11358	0.0970918	0.0706213	0.0896871	0.121878	0.100211	0.12972	0.0593062	0.0446826	0.0467109	0.0222299	0.0868242	0.0154995	0.0564611	0.0593936	0.0485195	0.201442	0.202646	0.224012	0.150063	0.151752	0.171436	0.0401797	0.0875373	0.0816845
Uridine	0.176914	0.155736	0.175991	0.12442	0.0749777	0.127121	0.0659475	0.0676734	0.0626319	0.0740741	0.0770693	0.0826257	0.138307	0.139357	0.1204	0.0465237	0.053676	0.0465941	0.0372929	0.0621548	0.0800078	0.0664303	0.0844976	0.0997018	0.107362	0.136964	0.117554
Valine	0.0593184	0.0409502	0.05779	0.571362	0.644621	0.545117	0.0490773	0.0486047	0.0679576	0.0772848	0.0688915	0.104177	0.619996	0.579526	0.591531	0.0833333	0.0906587	0.0998627	0.0475177	0.0367162	0.0508186	0.588738	0.590364	0.625479	0.0629501	0.0704777	0.0667784
Vanillic acid	0.108264	0.0929752	0.0740741	0.0952381	0.0983471	0.0751315	0.0722375	0.0733884	0.121713	0.0606061	0.0621488	0.0624426	0.250413	0.150198	0.236664	0.0709366	0.0870947	0.0891125	0.305392	0.247147	0.215595	0.0619835	0.0894065	0.0768954	0.0896376	0.0647383	0.103994
Xylitol	1.40813	1.13798	1.03966	0.0121107	0.0522881	0.0106401	0.0442253	0.0627742	0.0564121	0.0649827	0.968153	0.117875	0.0323454	0.0241513	0.0109311	0.0259516	0.0317474	0.0201321	0.0896359	0.0123364	0.0524811	0.0136967	0.00935829	0.0668694	1.14959	0.976244	1.02833
D-Xylose	0.893871	0.101211	0.101743	0.0832562	0.0244537	0.0964983	0.538694	0.583891	0.511527	0.0142704	0.0182478	0.00973249	0.0162309	0.015951	0.0905866	0.0196809	0.00658428	0.0122429	0.0110399	0.00781378	0.0178736	0.017768	0.0237752	0.069509	0.0644481	0.632199	0.593557
Secologanin	0.0739329	0.0977443	0.128937	0.0111458	0.0440937	0.0507606	1.05006	0.982944	1.00503	0.623497	0.899891	0.780145	0.304284	0.138686	0.108038	0.0392367	0.0405425	0.0239484	0.241579	0.154137	0.157417	0.145163	0.111957	0.155724	0.17686	0.159261	0.151331
alpha,beta-Trehalose	0.0936901	0.185661	0.0962118	0.100278	0.10577	0.0980702	1.75909	1.22241	1.31981	1.01095	1.08982	0.913533	0.492373	0.364732	0.667924	0.0893204	0.101495	0.0763731	0.0860786	0.0631993	0.0659307	0.100037	0.0783184	0.0948894	0.041597	0.0693556	0.0555755

## Sheet: Gene expression
cDNA	Endogenous Controls
	60S	UKN2	MYC-family	MYB	PP2C	NCED	ZEP	TPS	P5CR	RS	GolS	APXCHL	APXCIT	GSR	PetM	LHCB1	RCA
11644 Control R1	28.33	28.93	27.47	35.86	35.16	32.93	31.23	29.18	26.22	31.74	34.62	34.34	21.17	28.36	23.27	24.11	26.05
11644 Control R2	28.5	29.06	29.58	35.775	35.09	29.16	30.82	28.38	25.45	31.56	35.03	34.15	21.15	26.13	21.91	23.41	25.07
11644 Control R3	28.85	29.05	29	35.69	35.02	29.1	32.19	30	26.44	31.67	37.01	35.31	21.75	29.02	25	25.31	27.4
11644 WD R1	30.62	31.62	27.69	35	32.22	29.76	31.14	28.64	27.74	23.6	34.23	37.26	23.95	31.07	29.24	32.7	33.08
11644 WD R2	29.25	31.05	23.56	32.26	29.96	27.57	28.81	27.01	25.26	22.12	33.27	36.39	22.31	28.94	28.04	32.72	31.22
11644 WD R3	29	31.01	26.98	33.66	32	27.89	31.02	28.02	27.11	23.52	34.54	38.42	23.78	30.26	27.88	32.55	32.07
11644 RW R1	32.25	32.81	32.91	35.97	35.77	31.31	33.06	29.31	31	33.765	36.68	37.13	25.2	32.87	27.24	28.48	32.94
11644 RW R2	28.1	29.76	28.95	35.87	33.99	30.17	32.23	29.22	27.82	32.12	35.13	34.02	23.11	29.15	23.79	24.49	27.68
11644 RW R3	29.13	29.1	32.99	33.06	33.75	33.39	36	30.13	29.04	35.41	36.92	34.85	24.39	30.72	25.1	25.69	29.03
13241 Control R1	26.77	27.31	27.91	33.45	36	30.21	30.17	27.02	26.06	31.06	35.76	34.11	21.26	27.78	22.28	24.03	25.27
13241 Control R2	28.74	29.16	28.51	32.955	34.215	30.09	32.23	28.32	26.72	32.29	36.74	34.74	22.14	29.04	23.16	24.93	27.21
13241 Control R3	27.91	27.43	27.84	32.46	32.43	28.14	31.57	27.05	25.23	30.54	32.92	31.53	20.77	28.37	21.79	21.56	25.26
13241 WD R1	27.6	28.57	24.49	32.34	30.06	27.3	29.94	27.63	25.23	24.05	33.7	34.97	21.71	27.8	25.56	31.61	31.33
13241 WD R2	27	27.97	24.1	30.53	30.53	25.07	29.04	26.15	23.97	23.6	33.95	35.03	22.77	27.19	26.01	31.47	30.16
13241 WD R3	33.77	36	24.295	31.435	34.86	26.185	29.49	33.42	32.81	36.03	33.825	35	22.24	31.08	29.07	28.97	33.02
13241 RW R1	28.25	28.82	31	34.1	33.52	31	31.61	28.95	26.85	35.45	34.25	35.12	23.28	29.31	23.05	22.58	26.68
13241 RW R2	27.99	28.67	29.04	30.39	29.65	29.91	30.09	28.55	26.79	31.64	32.09	32.86	23.55	28.95	22.72	21.99	26.595
13241 RW R3	26.37	26.73	29	31.87	32.49	28.27	31.33	28.32	25.98	28.87	35.89	33.49	21.19	28	22.99	22.56	26.51
